# Supplementary material for: Self-supported iron-based bimetallic phosphide catalytic electrode for efficient hydrogen evolution reaction at high current density
Source: Royal Society of Chemistry journal article supplement (doi:10.1039/d3ta06035g), 2024-01-01
Supplement: d3ta06035g1.pdf [file d3ta06035g1.pdf]

1 **Supporting Information**

2 **Self-supported iron-based bimetallic phosphide catalytic electrode for**  
3 **efficient hydrogen evolution reaction at high current density**

4 Ziteng Zuo,<sup>a#</sup> Xian Zhang,<sup>b#</sup> Ouwen Peng,<sup>a</sup> Lianwei Shan,<sup>c</sup> Shengling Xiang,<sup>a</sup> Qing  
5 Lian,<sup>a</sup> Ningxue Li,<sup>a</sup> Guojun Mi,<sup>a</sup> Abbas Amini<sup>d</sup> and Chun Cheng<sup>a,e,\*</sup>

6 *<sup>a</sup>Department of Materials Science and Engineering, Southern University of Science and*  
7 *Technology, Shenzhen 518055, China*

8 *<sup>b</sup>School of Resources and Environmental Engineering, Wuhan University of*  
9 *Technology, Wenzhi Street 34, Wuhan 430070, China*

10 *<sup>c</sup>School of Materials Science and Chemical Engineering, Harbin University of Science*  
11 *and Technology, Harbin 150040, China*

12 *<sup>d</sup>Center for Infrastructure Engineering, Western Sydney University, Kingswood, New*  
13 *South Wales 2751, Australia*

14 *<sup>e</sup>Guangdong Provincial Key Laboratory of Energy Materials for Electric Power,*  
15 *Southern University of Science and Technology, Shenzhen 518055, China*

16 *Email: chengc@sustech.edu.cn*

17 # These authors contribute equally.

18

19

20

21

22

23

24

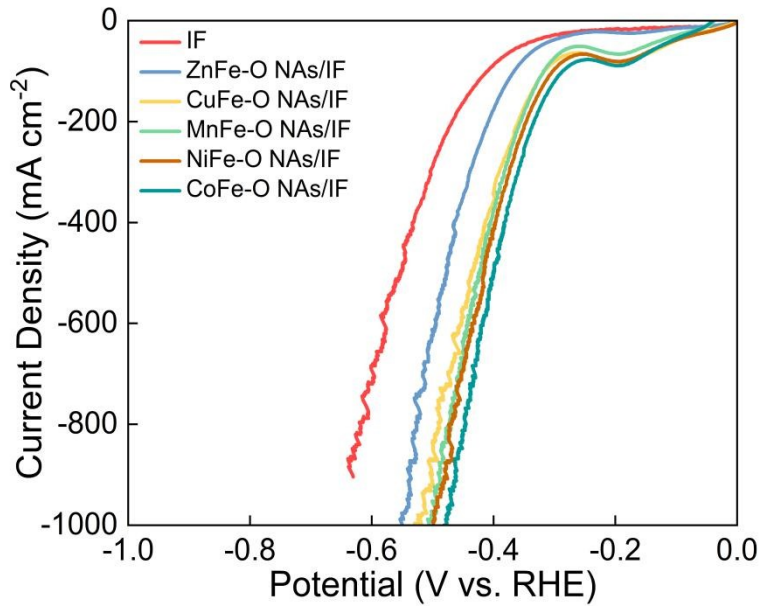

1  
2  
3  
4  
5  
6  
7  
8  
9  
10  
11  
12  
13  
14  
15  
16  
17  
18  
19

Fig. S1. LSV curves of electrodes soaked in different chloride solutions.  
(CoCl<sub>2</sub> is chosen as the solution for soaking process)

Among various MFe-O NAs/IF samples prepared under similar conditions, CoFe-O NAs/IF shows the best HER catalytic performance, that is chosen as the nanoarray precursors for subsequent phosphorization.

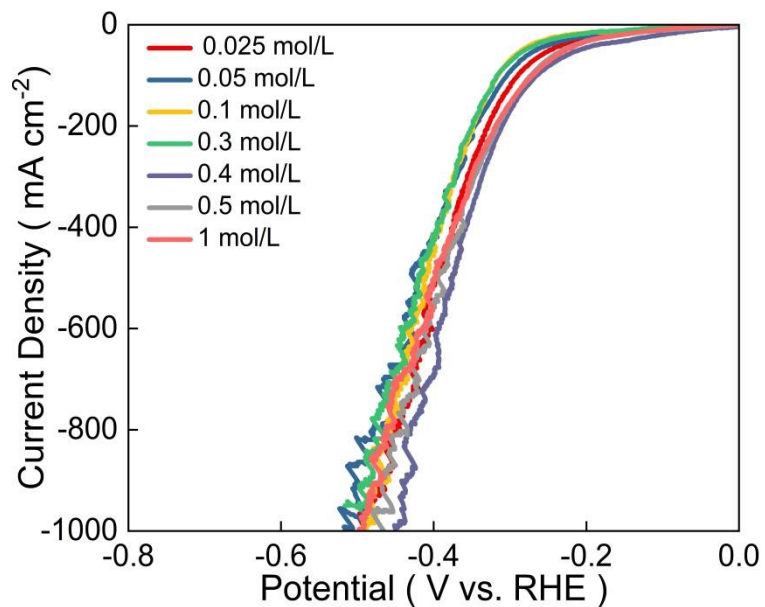

1

2 Fig. S2. LSV curves of CoFe-O NAs/IF prepared under different conditions.

3

(Other conditions are the same, optimized concentration is 0.4 M)

4

5

6

7

8

9

10

11

12

13

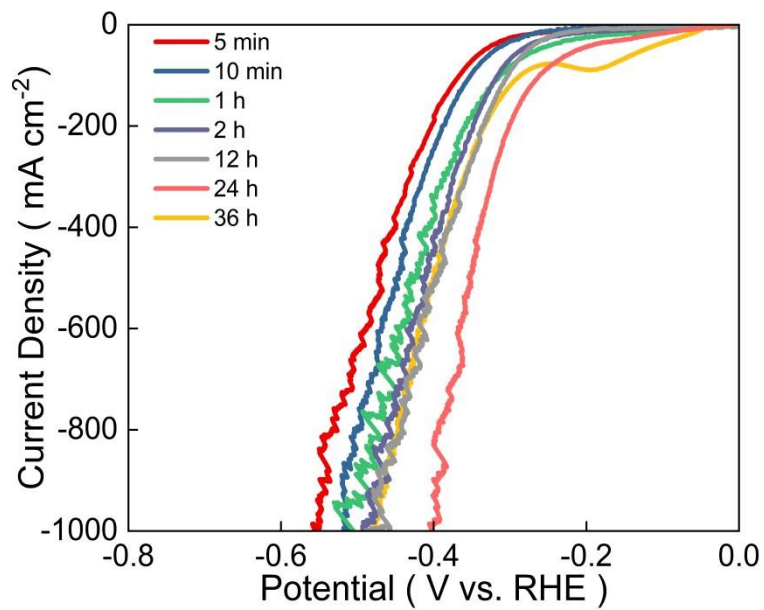

1

2 Fig. S3. LSV curves of CoFe-O NAs/IF prepared under different conditions.

3

(Other conditions are the same, optimized soaking time is 24 hours)

4

5

6

7

8

9

10

11

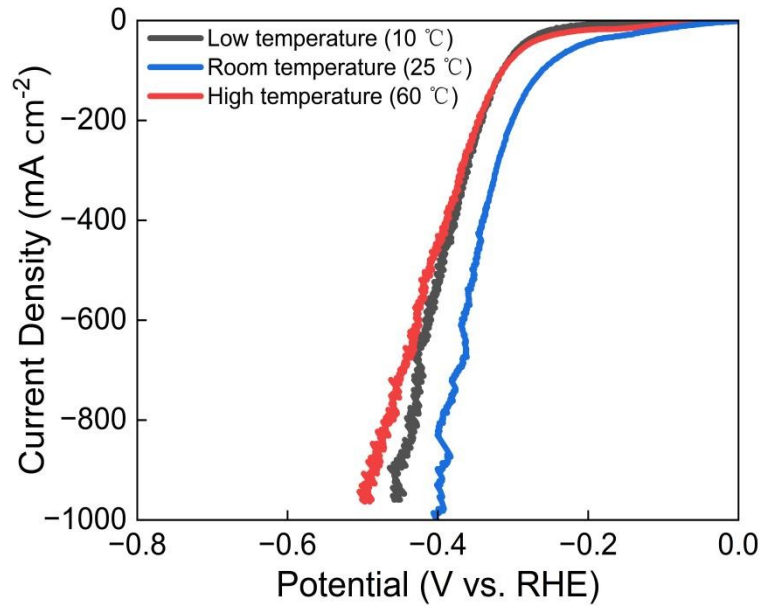

1

2 Fig. S4. LSV curves of CoFe-O NAs/IF prepared under different conditions.

3

4 (Other conditions are the same, optimized soaking temperature is room temperature)

5

6 According to the curves shown in **Figs. S2-S4**, the soaking conditions are optimized:

7 IF is soaked in 0.4 M CoCl<sub>2</sub> solution for 24 hours at room temperature.

8

9

10

11

12

13

14

15

16

17

18

19

20

21

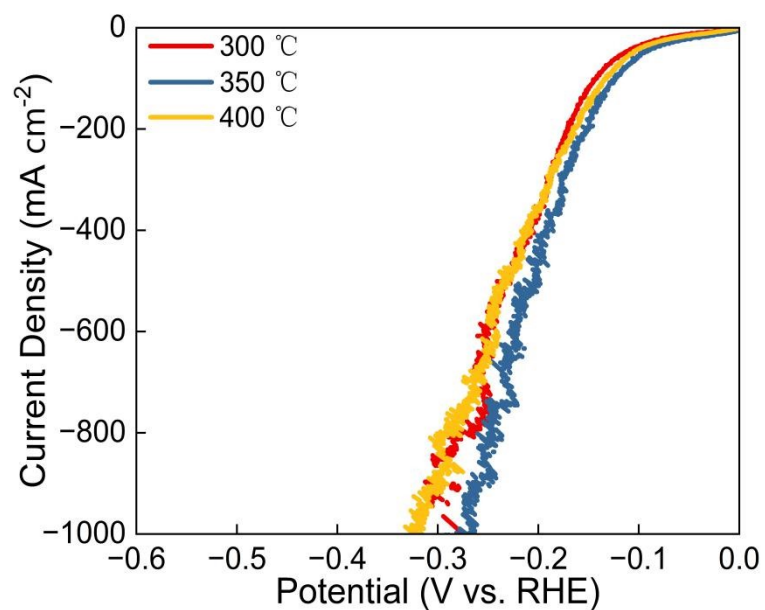

1

2

Fig. S5. LSV curves of CoFe-P NAs/IF prepared under different conditions.

3

(Other conditions are the same, optimized phosphorization temperature is 350 °C)

4

5

6

7

8

9

10

11

12

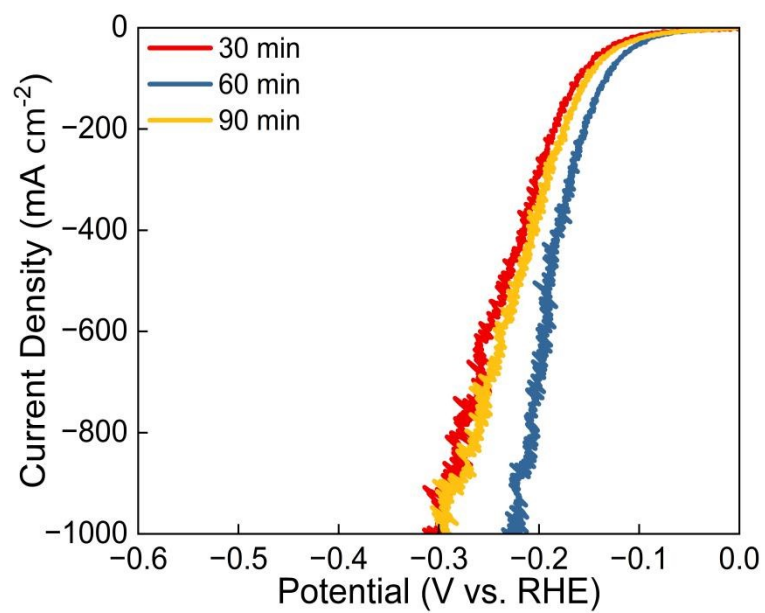

1

2 Fig. S6. LSV curves of CoFe-P NAs/IF prepared under different conditions.

3 (Other conditions are the same, optimized phosphorization time is 60 minutes)

4

5

6

7

8

9

10

11

12

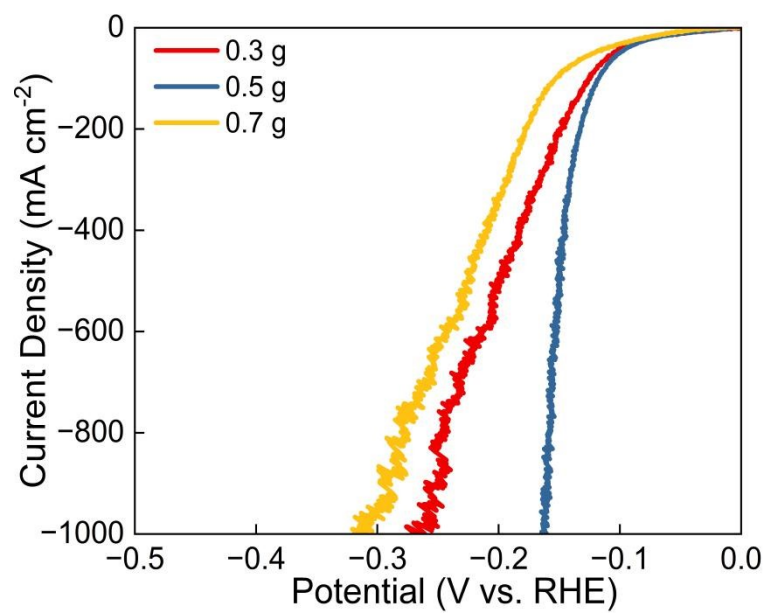

1

2 Fig. S7. LSV curves of CoFe-P NAs/IF prepared under different conditions.

3

(Other conditions are the same, optimized mass of NaH<sub>2</sub>PO<sub>2</sub> is 0.5 g)

4

5

6

7

8

9

10

11

12



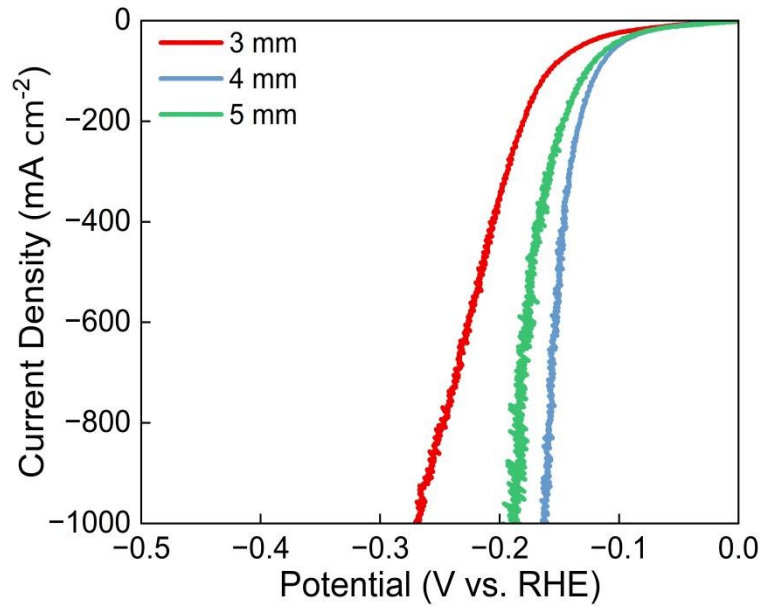

1

2 Fig. S8. LSV curves of CoFe-P NAs/IF prepared under different conditions.

3

(Other conditions are the same, optimized thickness of IF is 4 mm)

4

5 According to the curves shown in **Figs. S5-S8**, the chemical vapor deposition

6 conditions are optimized: CoFe-O NAs/IF (thickness of IF is 4 mm) is phosphorized at

7 350 °C for 60 minutes, while 0.5 g NaH<sub>2</sub>PO<sub>2</sub> acts as the source of P.

8

9

10

11

12

13

14

15

16

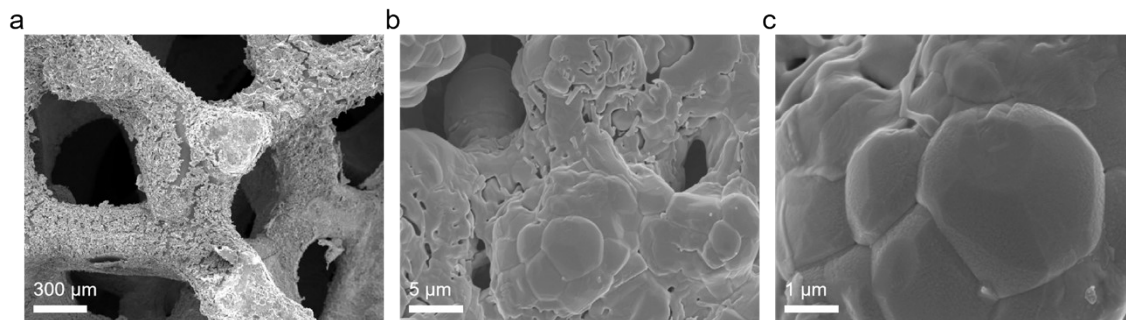

1  
2  
3  
4  
5  
6  
7  
8  
9  
10  
11  
12  
13  
14  
15  
16  
17  
18  
19  
20  
21

Fig. S9. SEM images of IF.

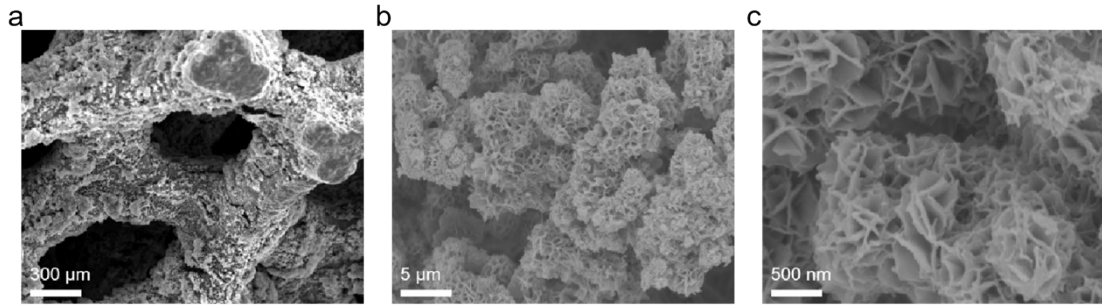

Fig. S10. SEM images of CoFe-O NAs/IF.

1  
2  
3  
4  
5  
6  
7  
8  
9  
10  
11  
12  
13  
14  
15  
16  
17  
18  
19  
20  
21  
22  
23  
24  
25  
26  
27  
28  
29  
30  
31

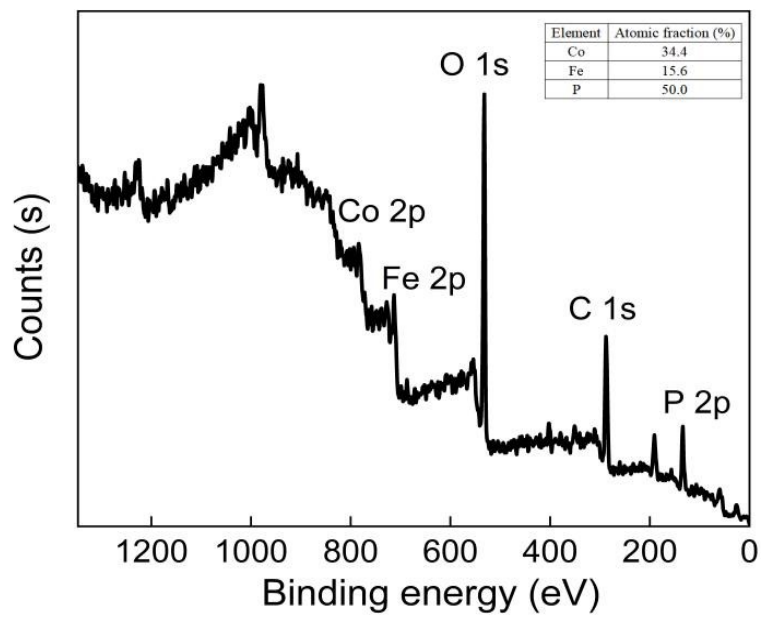

Fig. S11. XPS survey scan of CoFe-P NAs/IF.

1  
2  
3  
4  
5  
6  
7  
8  
9  
10  
11  
12  
13  
14  
15  
16  
17  
18  
19  
20

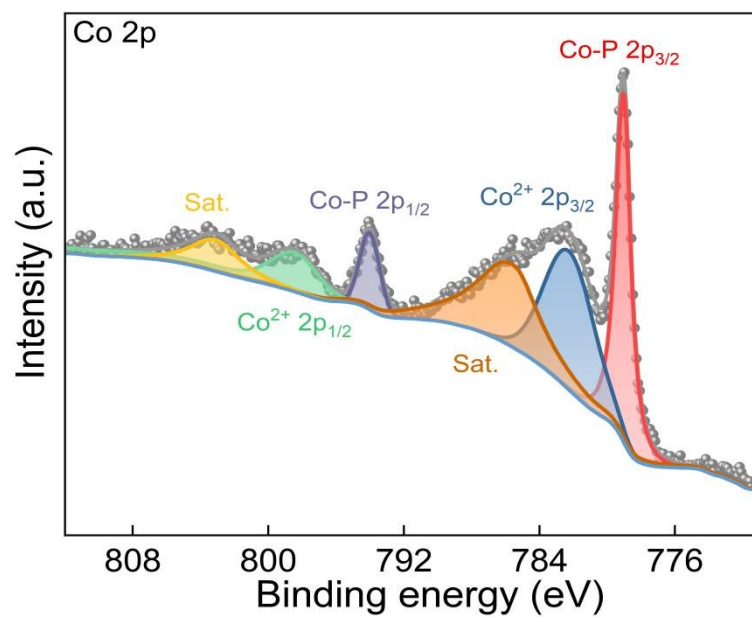

Fig. S12. High resolution Co 2p XPS spectrum of CoFe-P NAs/IF.

1  
2  
3  
4  
5  
6  
7  
8  
9  
10  
11  
12  
13  
14  
15  
16  
17  
18  
19  
20  
21

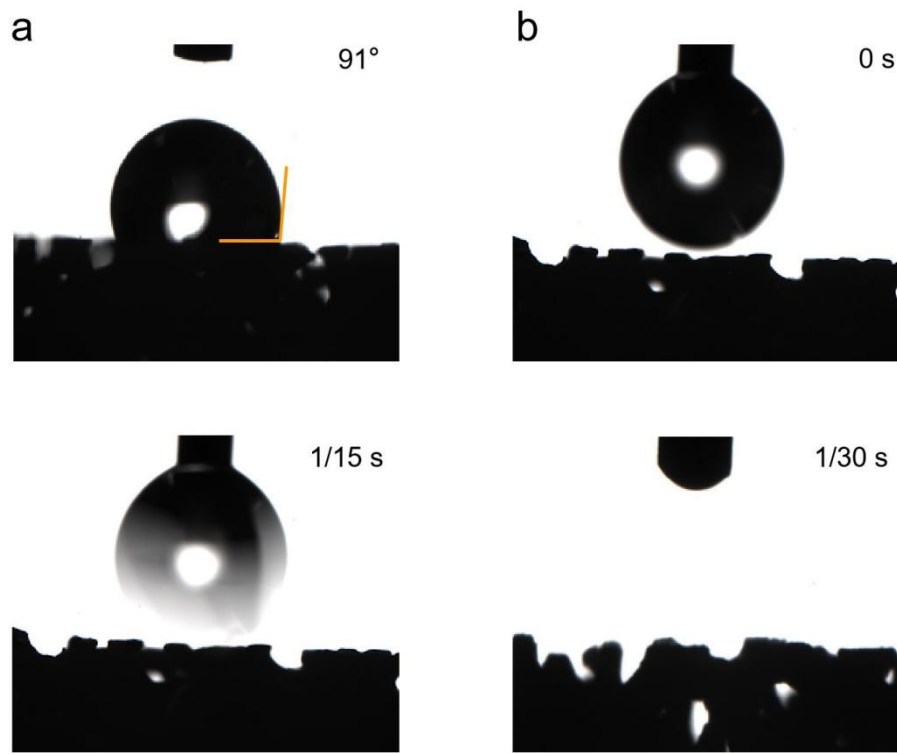

1  
2  
3  
4  
5  
6  
7  
8  
9  
10  
11  
12  
13

Fig. S13. Advancing contact angles of (a) IF and (b) CoFe-P NAs/IF.

1 **Estimation of Electrochemical Active Surface Area.**

2 The electrochemical double-layer capacitance ( $C_{dl}$ ) is calculated to estimate the  
3 electrochemical surface area (ECSA) through cyclic voltammetry (CV) measurement  
4 at different scan rates. By plotting current density differences ( $\Delta j = |j_a - j_c|/2$ ) against the  
5 CV scan rates, the  $C_{dl}$  values can be calculated. The  $C_{dl}$  can be converted to an ECSA  
6 using the specific capacitance value for a flat standard with 1 cm<sup>2</sup> of real surface area.  
7 The specific capacitance for a flat surface is generally found to be within the range  
8 of 20-60  $\mu\text{F cm}^{-2}$ .<sup>1</sup> In the calculation of turnover frequency, 40  $\mu\text{F cm}^{-2}$  is used for  
9 calculations. The ECSA can be calculated from the following equation:

$$A_{ECSA} = \frac{C_{dl \text{ of electrode (mF cm}^{-2}\text{)}}}{40 \mu\text{F cm}^{-2} \text{ per cm}_{ECSA}^2}$$

10  
11  
12  
13  
14  
15  
16  
17  
18  
19  
20  
21  
22  
23  
24  
25

26 **Turnover frequency calculation.**

1 The turnover frequency (TOF) is calculated from the following equation:

$$2 \quad TOF = \frac{\# \text{ of total hydrogen turnovers/cm}^2 \text{ geometric area}}{\# \text{ of active sites/cm}^2 \text{ geometric area}}$$

3 The total number of hydrogen turnovers is obtained from the corresponding current

4 density of:

$$5 \quad \begin{aligned} \#_{H_2} &= \left( j \frac{mA}{cm^2} \right) \left( \frac{1 C s^{-1}}{1000 mA} \right) \left( \frac{1 mol e^{-}}{96485.3 C} \right) \left( \frac{1 mol H_2}{2 mol e^{-}} \right) \left( \frac{6.022 \times 10^{23} H_2 \text{ molecules}}{1 mol H_2} \right) = 3 \\ &\text{per } \frac{mA}{cm^2} \end{aligned}$$

6 As the exact hydrogen binding site is not known, we estimate the number of active sites

7 as the number of surface sites (including the whole atoms as the postulated active sites)

8 from the roughness factor together with the unit cell and simulated models in DFT

9 calculations.

10 The number of surface sites per real surface area:

$$11 \quad \#_{Active Sites}^{IF} = \left( \frac{2 \text{ atoms/unit cell}}{23.4 \text{ \AA}^3/\text{unit cell}} \right)^{\frac{2}{3}} = 1.940 \times 10^{15} \text{ atoms cm}_{real}^{-2}$$

12

$$13 \quad \#_{Active Sites}^{FeP} = \left( \frac{4 \text{ atoms/unit cell}}{93.2 \text{ \AA}^3/\text{unit cell}} \right)^{\frac{2}{3}} = 1.226 \times 10^{15} \text{ atoms cm}_{real}^{-2}$$

14

$$15 \quad \#_{Active Sites}^{CoFe-P} = \left( \frac{205 \text{ atoms/unit cell}}{4847.7 \text{ \AA}^3/\text{unit cell}} \right)^{\frac{2}{3}} = 1.214 \times 10^{15} \text{ atoms cm}_{real}^{-2}$$

16 Finally, the plot of current density can be converted to a TOF plot based on the

17 following equation:



$$TOF = \frac{(3.12 \times 10^{15} \frac{H_2 \text{ molecule } s^{-1}}{cm^2} \text{ per } \frac{mA}{cm^2}) \times |j|}{\#_{Active Sites} \times A_{ECSA}}$$

1

2

1 **Comparison of HER performances of CoFe-P NAs/IF (this work) with other**  
 2 **electrodes.**

3 Table S1. Comparison of different HER electrodes.

| <b>Catalysts</b>                                                    | <b>Overpotential at</b>      | <b>Overpotential at</b>       | <b>Overpotential at</b>       | <b>Overpotential at</b>        |
|---------------------------------------------------------------------|------------------------------|-------------------------------|-------------------------------|--------------------------------|
|                                                                     | <b>10 mA cm<sup>-2</sup></b> | <b>100 mA cm<sup>-2</sup></b> | <b>500 mA cm<sup>-2</sup></b> | <b>1000 mA cm<sup>-2</sup></b> |
| <b>CoFe-P NAs/IF</b><br><b>(This work)</b>                          | <b>40 mV</b>                 | <b>108 mV</b>                 | <b>151 mV</b>                 | <b>162 mV</b>                  |
| MoS <sub>2</sub> /Ni <sub>3</sub> S <sub>2</sub> NW-NF <sup>2</sup> | 70 mV                        | 137 mV                        | 182 mV                        | 200 mV                         |
| MoS <sub>2</sub> /Mo <sub>2</sub> C-Ti foil <sup>3</sup>            | —                            | —                             | 191 mV                        | 220 mV                         |
| Co-B-P/NF <sup>4</sup>                                              | 42 mV                        | —                             | —                             | 165 mV                         |
| NiCoP/NF <sup>5</sup>                                               | 55 mV                        | 122 mV                        | 171 mV                        | 193 mV                         |
| Co <sub>2</sub> P–Ni <sub>12</sub> P <sub>5</sub> /NF <sup>6</sup>  | 37 mV                        | 109 mV                        | 173 mV                        | 219 mV                         |
| CoFeOH/CoFeP/IF <sup>7</sup>                                        | —                            | 114.9 mV                      | 194.9 mV                      | 221.8 mV                       |
| P-Fe <sub>3</sub> O <sub>4</sub> /IF <sup>8</sup>                   | —                            | 138 mV                        | 220 mV                        | 240 mV                         |
| F-Co <sub>2</sub> P/Fe <sub>2</sub> P/IF <sup>9</sup>               | —                            | 151.8 mV                      | 229.8 mV                      | 260.5 mV                       |

4

5

6

7

8

9

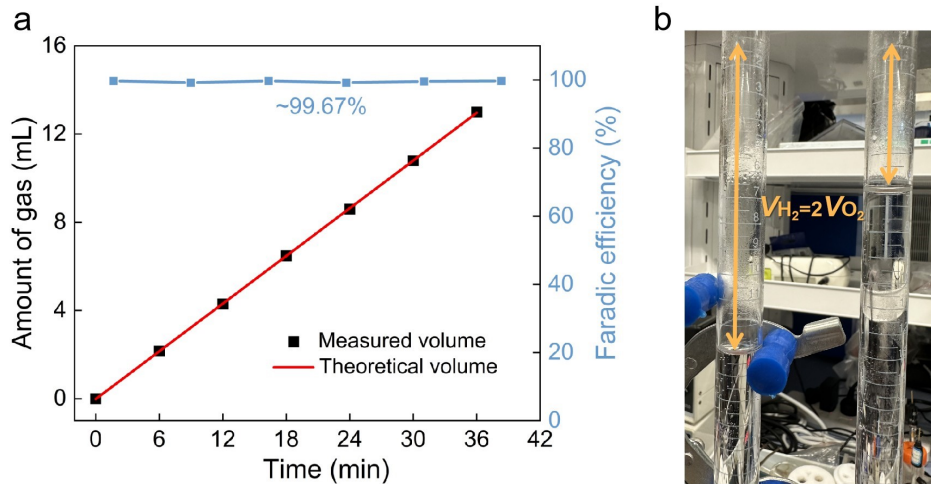

1

2 Fig. S14. (a) Measurement of Faradic efficiency of CoFe-P NAs/IF||CoFe-P NAs/IF.

3

(b) Optical image of Hoffman apparatus setup.<sup>10</sup>

4

5

6

7

8

9

10

11

12

13

14

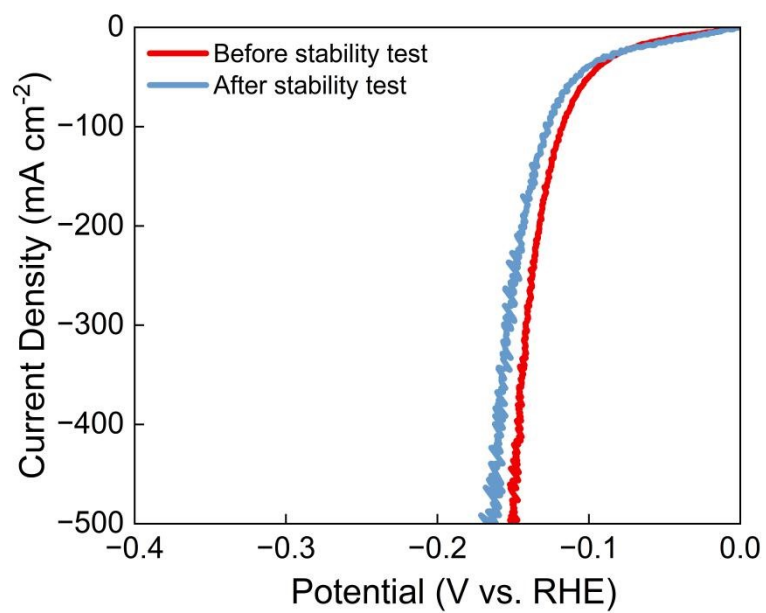

1

2

Fig. S15. LSV curves of CoFe-P NAs/IF before and after stability test.

3

4

5

6

7

8

9

10

11

12

13

14

15

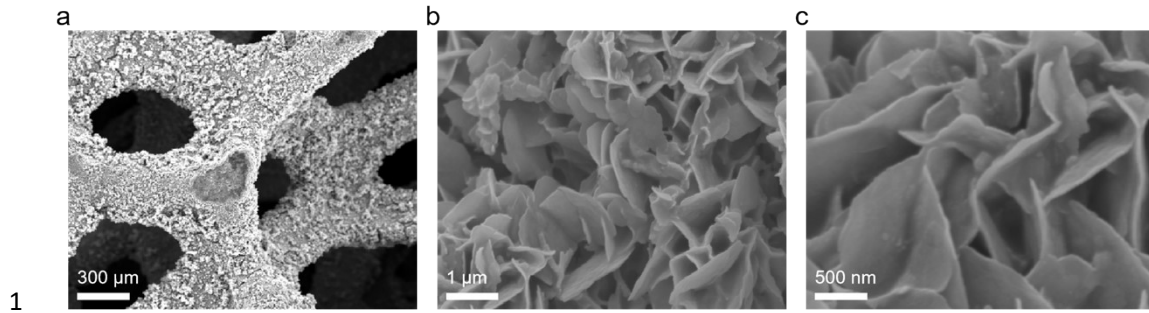

Fig. S16. SEM images of CoFe-P NAs/IF after stability test.

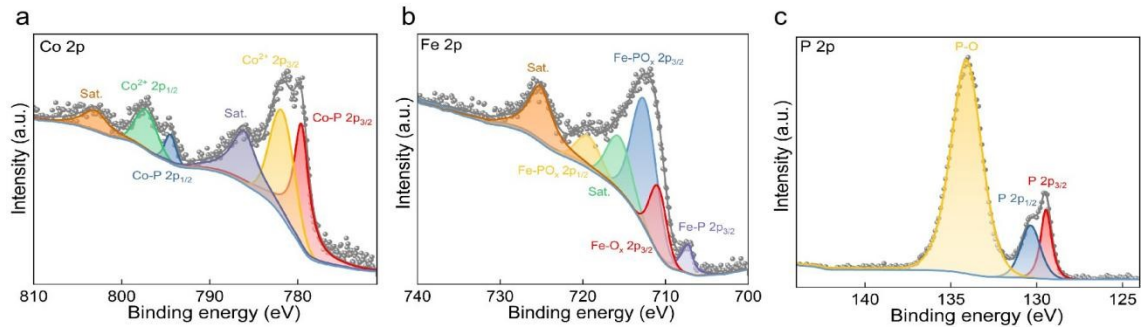

Fig. S17. XPS spectra of CoFe-P NAs/IF after stability test. (a) Co 2p.  
(b) Fe 2p. (c) P 2p.

1  
2  
3  
4  
5  
6  
7  
8  
9  
10  
11  
12  
13  
14  
15  
16  
17  
18

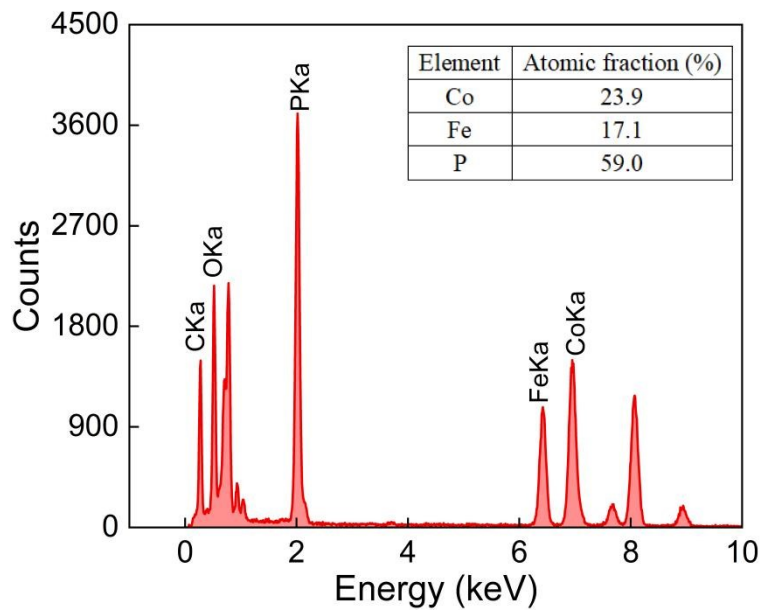

1  
2  
3  
4  
5  
6  
7  
8  
9  
10  
11  
12  
13  
14  
15  
16  
17  
18  
19  
20  
21

Fig. S18. EDX spectrum of CoFe-P NAs/IF and atomic fractions of the constituent elements.

The atomic ratio of Co:Fe in CoFe-P NAs/IF is approximately 1.4:1, which is consistent with the values in Fig. S11 basically. Some differences arise from the distinction of investigation depth between XPS and EDX. The investigation depth of XPS is about 2-4 nm, while that of EDX is around 1-3  $\mu\text{m}$ , so it is understandable that the data obtained from these two methods exists some differences.

## 1 References

- 2 1 M. Jin, X. Zhang, R. Shi, Q. Lian, S. Niu, O. Peng, Q. Wang and C. Cheng, *Appl.*  
3 *Catal. B - Environ.*, 2021, **296**, 120350.
- 4 2 S. Xue, Z. Liu, C. Ma, H. M. Cheng and W. Ren, *Sci. Bull.*, 2020, **65**, 123.
- 5 3 Y. Luo, L. Tang, U. Khan, Q. Yu, H. M. Cheng, X. Zou and B. Liu, *Nat. Commun.*,  
6 2019, **10**, 269.
- 7 4 H. Sun, X. Xu, Z. Yan, X. Chen, L. Jiao, F. Cheng and J. Chen, *J. Mater. Chem. A*,  
8 2018, **6**, 22062.
- 9 5 L. Li, W. Zou, Q. Ye, Q. Li, Q. Feng, J. Wei, X. Xu and F. Wang, *J. Power. Sources*,  
10 2021, **516**, 230657.
- 11 6 L. Guo, X. Liu, Z. He, Z. Chen, Z. Zhang, L. Pan, Z. Huang, X. Zhang, Y. Fang and  
12 J. J. Zou, *ACS Sustain. Chem. Eng.*, 2022, **10**, 9956.
- 13 7 X. Y. Zhang, F. L. Wang, J. Y. Fu, Y. N. Zhen, B. Dong, Y. N. Zhou, H. J. Liu, D. P.  
14 Liu, C. G. Liu and Y. M. Chai, *J. Power. Sources*, 2021, **507**, 230279.
- 15 8 J. Zhang, X. Shang, H. Ren, J. Chi, H. Fu, B. Dong, C. Liu and Y. Chai, *Adv. Mater.*,  
16 2019, **31**, 1905107.
- 17 9 X. Y. Zhang, Y. R. Zhu, Y. Chen, S. Y. Dou, X. Y. Chen, B. Dong, B. Y. Guo, D. P.  
18 Liu, C. G. Liu and Y. M. Chai, *Chem. Eng. J.*, 2020, **399**, 125831.
- 19 10 X. Yu, Z. Yu, X. Zhang, Y. Zheng, Y. Duan, Q. Gao, R. Wu, B. Sun, M. Gao, G.  
20 Wang and S. Yu, *J. Am. Chem. Soc.*, 2019, **141**, 7537.

21
